# Supplementary material
Source: PubMed Central journal article supplement (PMC2857574)
Supplement: NIHMS191321-supplement-1.pdf [file NIHMS191321-supplement-1.pdf]

# Covalent Cross-Linking of Glutathione and Carnosine to Proteins by 4-Oxo-2-nonenal<sup>§</sup>

Xiaochun Zhu<sup>†</sup>, Molly M. Gallogly<sup>+</sup>, John J. Mieyal<sup>+</sup>, Vernon E. Anderson<sup>\*‡</sup>,  
and Lawrence M. Sayre<sup>¶,†</sup>

<sup>†</sup> Department of Chemistry, Case Western Reserve University

<sup>+</sup> Department of Pharmacology, Case Western Reserve University

<sup>‡</sup> Department of Biochemistry, Case Western Reserve University

Cleveland, OH 44106

## Supporting Information

**Table S1. GSH–ONE-modified  $\beta$ -LG peptides detected by HPLC-ESI-MS/MS in the chymotryptic digest**

| Peptide sequence | Position | Mass of GSH–ONE-modified peptide |                              | Modified residue |
|------------------|----------|----------------------------------|------------------------------|------------------|
|                  |          | Theoretical                      | Observed                     |                  |
| LIVTQ            | 1–5      | 998.52/1007.58                   | 998.59/1007.60               | L1               |
| LIVTQT           | 1–6      | 1099.57/1108.63                  | 1099.59/1108.64              | L1               |
| KGL              | 8–10     | 742.38/751.44                    | 742.46/751.48                | K8               |
| KGLDIQ           | 8–13     | 1098.55/1107.61                  | 1098.57/1107.58              | K8               |
| KGLDIQKVAGTW     | 8–19     | 1740.89/1749.95                  | 1740.81/1749.89              | K8               |
| KGLDIQKVAGTW     | 8–19     | 1740.89/1749.95                  | 1740.86/1749.88              | K14              |
| DIQKVAGTW        | 11–19    | 1442.71/1451.75                  | 1442.61/1451.64              | K14              |
| KVAGTW           | 14–19    | 1086.53/1095.59                  | 1086.50/1095.60              | K14              |
| VEELKPTPEGDLEIL  | 43–57    | 2107.05/2116.11                  | 1054.36/1058.90 <sup>#</sup> | K47              |
| LQKW             | 58–61    | 999.50/1008.55                   | 999.52/1008.57               | K60              |
| QKW              | 59–61    | 886.41/895.47                    | 886.35/895.43                | K60              |
| TKIPAVF          | 76–82    | 1200.63/1209.69                  | 1200.67/1209.66              | K77              |
| KIDAL            | 83–87    | 984.51/993.56                    | 984.50/993.56                | K83              |
| KIDALN           | 83–88    | 1098.55/1107.61                  | 1098.54/1107.51              | K83              |
| KIDALNENKVL      | 83–93    | 1681.88/1690.94                  | 1681.76/1690.74              | K83              |
| KIDALNENKVL      | 83–93    | 1681.88/1690.94                  | 1681.82/1690.91              | K91              |
| NENKVL           | 88–93    | 1141.56/1150.61                  | 1141.55/1150.57              | K91              |
| KVL              | 91–93    | 784.43/793.48                    | 784.44/793.48                | K91              |
| KKY              | 100–102  | 863.43/872.49                    | 863.49/872.54                | K100             |

|                |         |                 |                              |      |
|----------------|---------|-----------------|------------------------------|------|
| KKY            | 100–102 | 863.43/872.49   | 863.51/872.56                | K101 |
| VRTPEVDDEALEKF | 123–136 | 2072.99/2082.04 | 1037.39/1041.85 <sup>#</sup> | K135 |
| DKAL           | 137–140 | 871.42/880.48   | 871.42/880.53                | K138 |
| KALPM          | 141–145 | 984.49/993.55   | 984.53/993.58                | K141 |

<sup>#</sup>: double charged peak

**Table S2. Carnosine–ONE-modified  $\beta$ -LG peptides detected by HPLC-ESI-MS/MS in the chymotryptic digest**

| Peptide sequence | Position | Mass of Carnosine–ONE-modified peptide |                              | Modified residue |
|------------------|----------|----------------------------------------|------------------------------|------------------|
|                  |          | Theoretical                            | Observed                     |                  |
| KGL              | 8–10     | 661.40/670.43                          | 661.47/670.57                | K8               |
| VEELKPTPEGDLEIL  | 43–57    | 2026.07/2035.10                        | 1013.80/1018.74 <sup>#</sup> | K47              |
| LQKW             | 58–61    | 918.52/927.55                          | 918.56/927.57                | K60              |
| KIDAL            | 83–87    | 903.53/912.57                          | 903.59/912.58                | K83              |
| KIDALNENKVL      | 83–93    | 1600.91/1609.93                        | 1600.80/1609.90              | K91              |
| KKY              | 100–102  | 782.46/791.48                          | 782.44/791.58                | K100 or K101     |
| VRTPEVDDEALEKF   | 123–136  | 1992.01/2001.03                        | 996.85/1001.31 <sup>#</sup>  | K135             |
| DKAL             | 137–140  | 790.45/799.47                          | 790.50/799.49                | K138             |
| KALPM            | 141–145  | 903.51/912.54                          | 903.60/912.58                | K141             |
| HIRL             | 146–149  | 882.53/891.56                          | 882.66/891.86                | H146             |

<sup>#</sup>: double charged peak

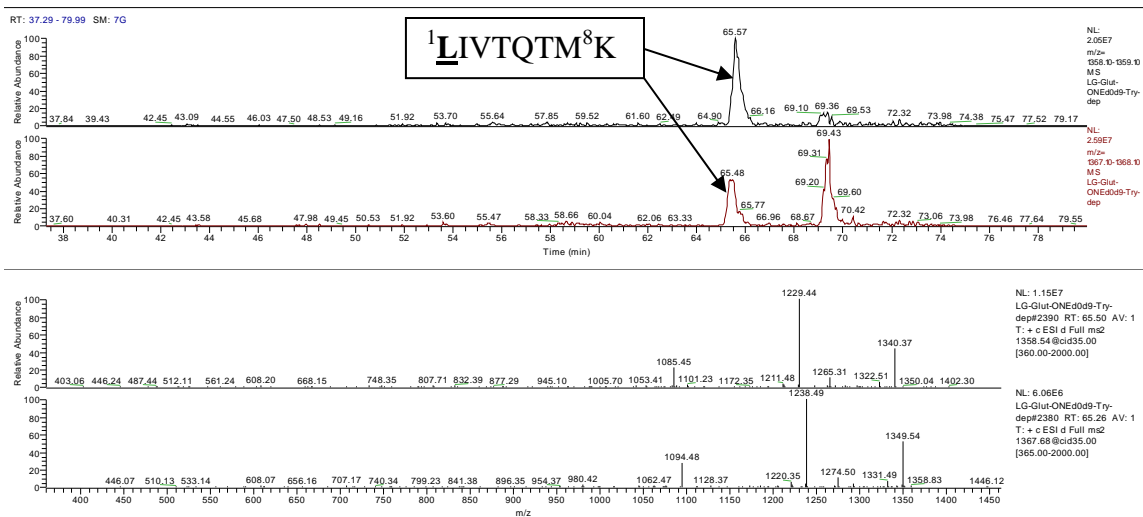

**Figure S1. SIC and tandem mass spectrum of modified  $^1$ LIVTQTM $^8$ K at L1 by GSH– $d_0$ -ONE MA (1<sup>nd</sup> trace and 1<sup>st</sup> spectrum) or GSH– $d_9$ -ONE MA (2<sup>nd</sup> trace and 2<sup>nd</sup> spectrum).**

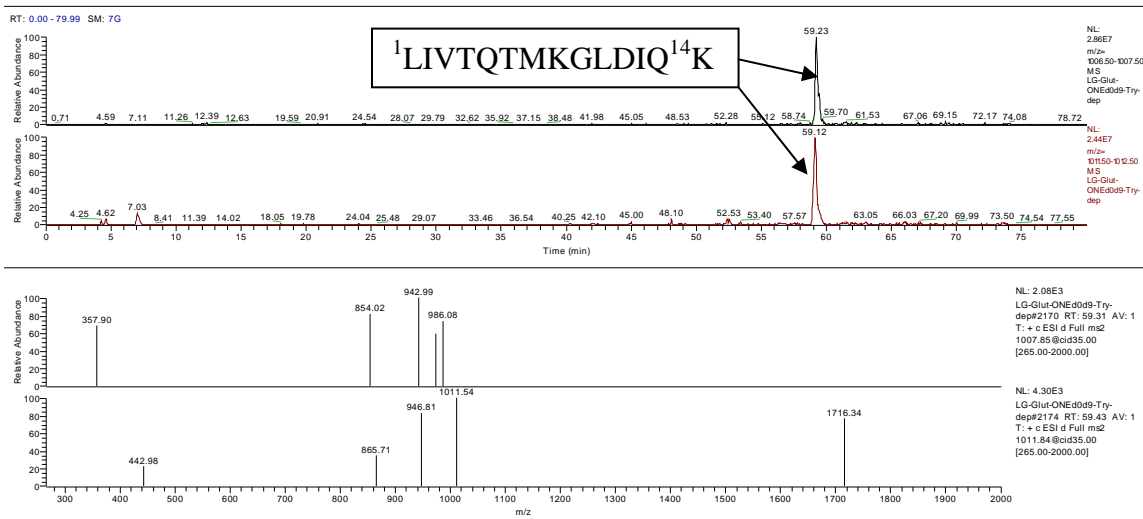

**Figure S2.** SIC and tandem mass spectrum of modified <sup>1</sup>LIVTQTMKGLDIQ<sup>14</sup>K at L1 or K8 by GSH-*d*<sub>0</sub>-ONE MA (1<sup>nd</sup> trace and 1<sup>st</sup> spectrum) or GSH-*d*<sub>9</sub>-ONE MA (2<sup>rd</sup> trace and 2<sup>nd</sup> spectrum).

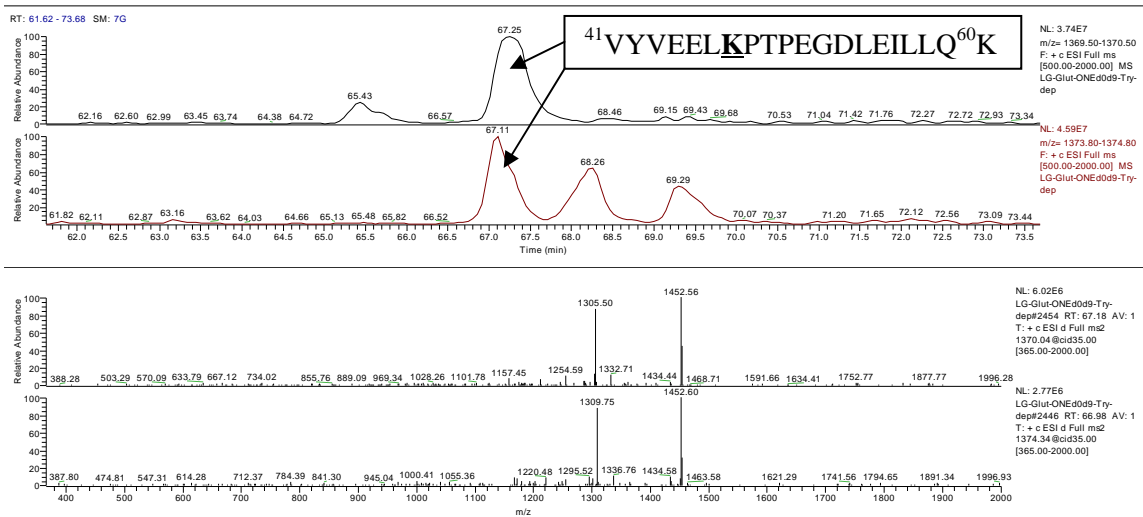

**Figure S3.** SIC and tandem mass spectrum of modified <sup>41</sup>VYVEELKPTPEGDLEILLQ<sup>60</sup>K at K47 by GSH-*d*<sub>0</sub>-ONE MA (1<sup>nd</sup> trace and 1<sup>st</sup> spectrum) or GSH-*d*<sub>9</sub>-ONE MA (2<sup>rd</sup> trace and 2<sup>nd</sup> spectrum).

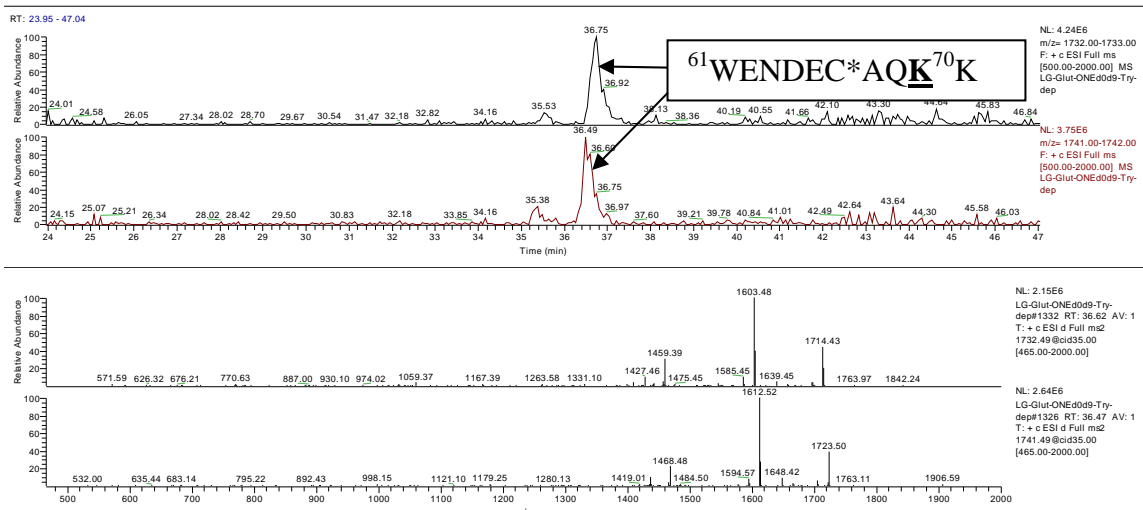

**Figure S4.** SIC and tandem mass spectrum of modified  $^{61}\text{WENDEC}^*\text{AQK}^{70}\text{K}$  at K69 by GSH- $d_0$ -ONE MA (1<sup>nd</sup> trace and 1<sup>st</sup> spectrum) or GSH- $d_9$ -ONE MA (2<sup>nd</sup> trace and 2<sup>nd</sup> spectrum).

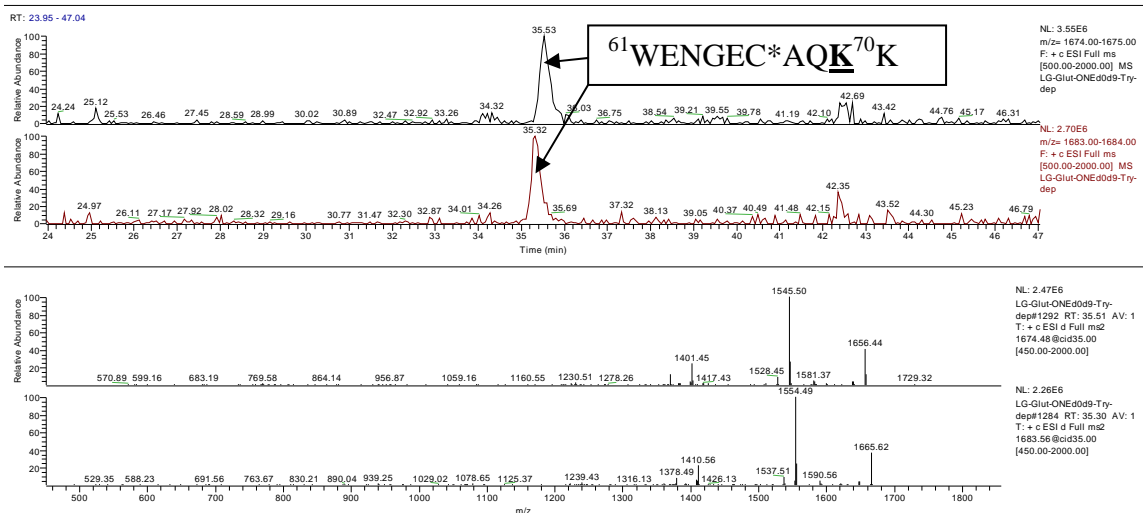

**Figure S5.** SIC and tandem mass spectrum of modified  $^{61}\text{WENGEK}^*\text{AQK}^{70}\text{K}$  at K69 by GSH- $d_0$ -ONE MA (1<sup>nd</sup> trace and 1<sup>st</sup> spectrum) or GSH- $d_9$ -ONE MA (2<sup>nd</sup> trace and 2<sup>nd</sup> spectrum).

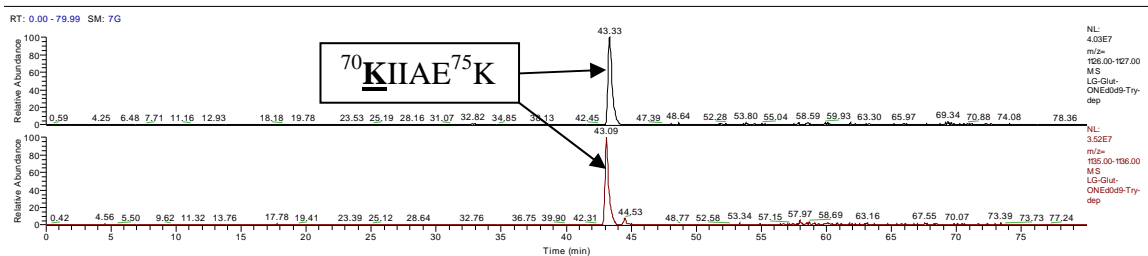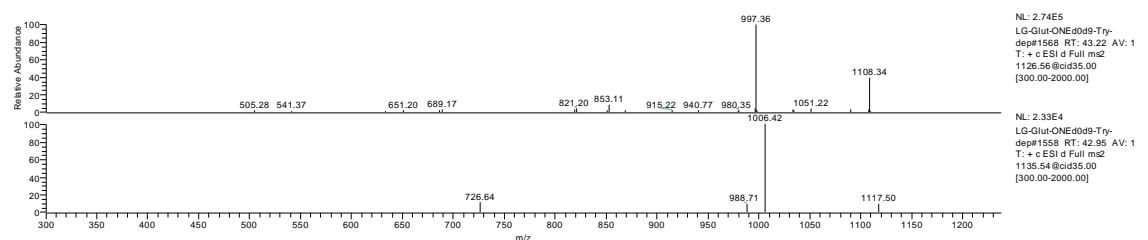

**Figure S6.** SIC and tandem mass spectrum of modified  $^{70}\text{KIIAE}^{75}\text{K}$  at K70 by GSH- $d_0$ -ONE MA (1<sup>nd</sup> trace and 1<sup>st</sup> spectrum) or GSH- $d_9$ -ONE MA (2<sup>nd</sup> trace and 2<sup>nd</sup> spectrum).

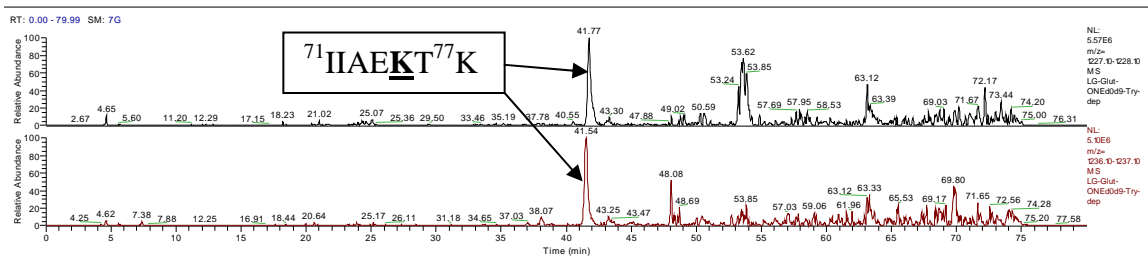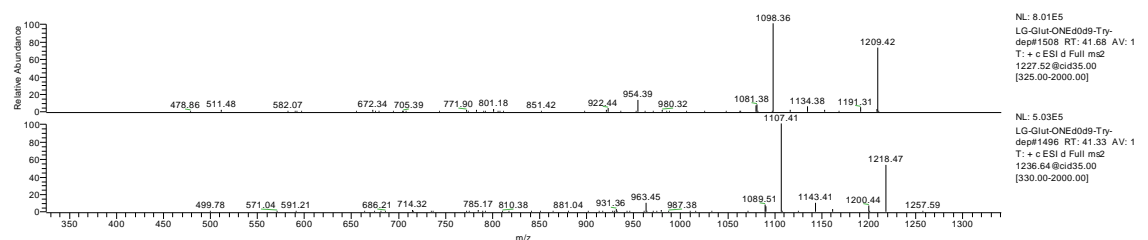

**Figure S7.** SIC and tandem mass spectrum of modified  $^{71}\text{IIAEKT}^{77}\text{K}$  at K75 by GSH- $d_0$ -ONE MA (1<sup>nd</sup> trace and 1<sup>st</sup> spectrum) or GSH- $d_9$ -ONE MA (2<sup>nd</sup> trace and 2<sup>nd</sup> spectrum).

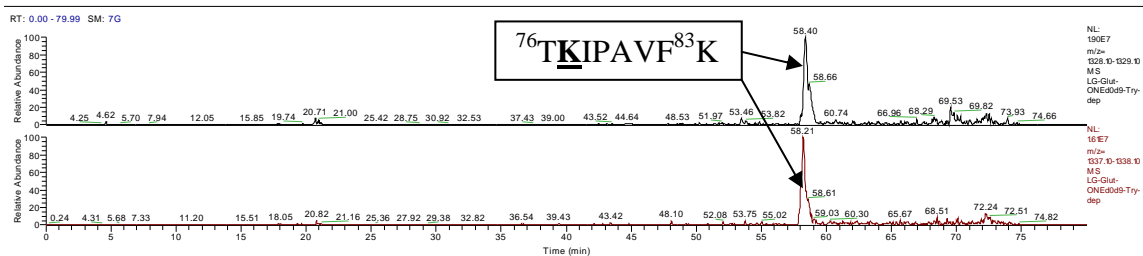

**Figure S8.** SIC and tandem mass spectrum of modified  $^{76}\text{TKIPAVF}^{83}\text{K}$  at K77 by GSH- $d_0$ -ONE MA (1<sup>nd</sup> trace and 1<sup>st</sup> spectrum) or GSH- $d_9$ -ONE MA (2<sup>nd</sup> trace and 2<sup>nd</sup> spectrum).

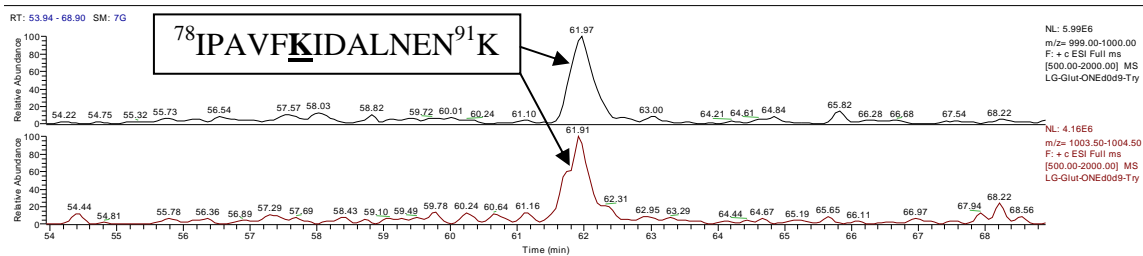

**Figure S9.** SIC and tandem mass spectrum of modified  $^{78}\text{IPAVFKIDALNEN}^{91}\text{K}$  at K83 by GSH- $d_0$ -ONE MA (1<sup>nd</sup> trace and 1<sup>st</sup> spectrum) or GSH- $d_9$ -ONE MA (2<sup>nd</sup> trace and 2<sup>nd</sup> spectrum).

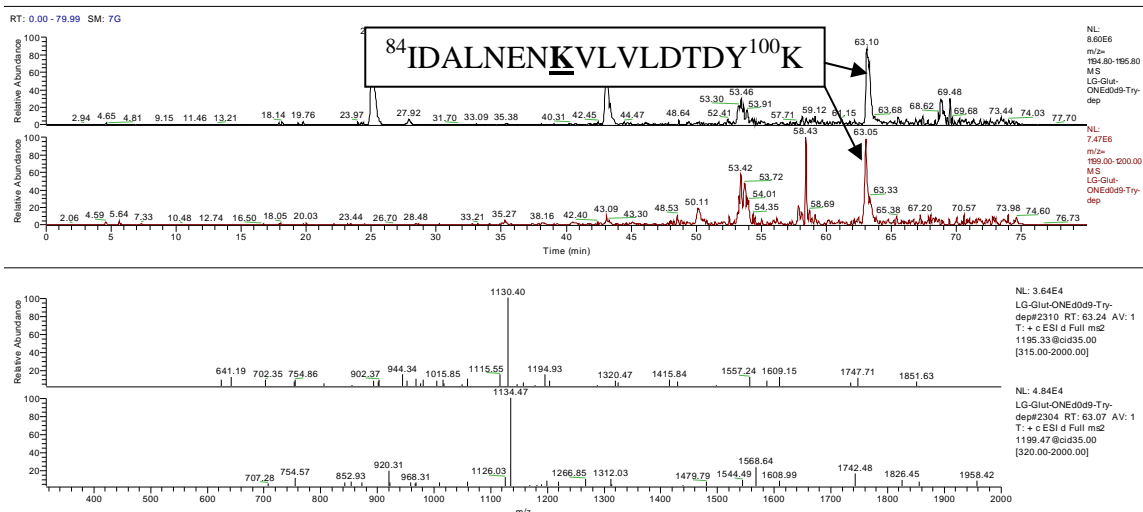

**Figure S10.** SIC and tandem mass spectrum of modified  $^{84}\text{IDALNENKVLVLDTDY}^{100}\text{K}$  at K91 by GSH- $d_0$ -ONE MA (1<sup>nd</sup> trace and 1<sup>st</sup> spectrum) or GSH- $d_9$ -ONE MA (2<sup>nd</sup> trace and 2<sup>nd</sup> spectrum).

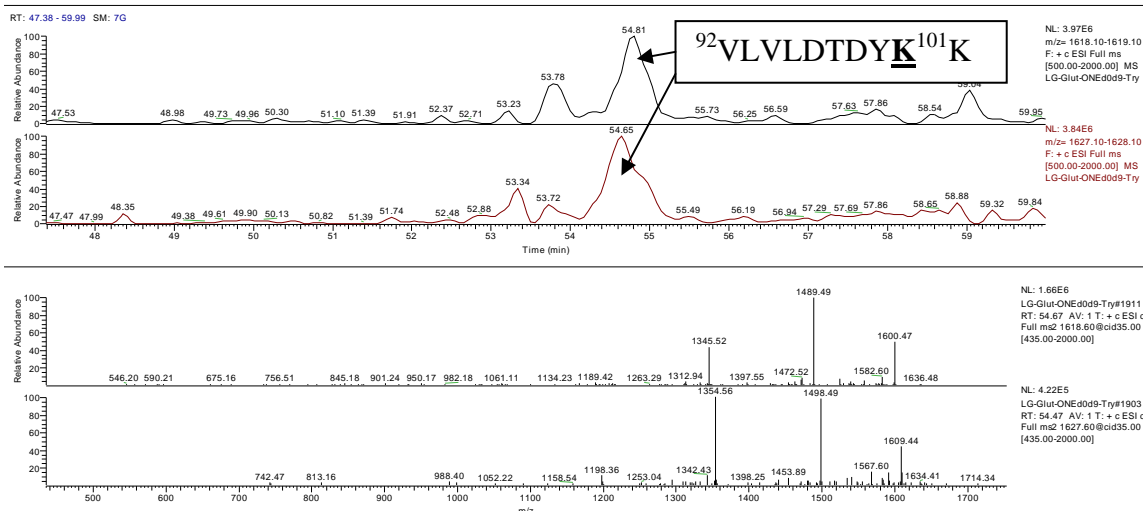

**Figure S11.** SIC and tandem mass spectrum of modified  $^{92}\text{VLVLDTDYK}^{101}\text{K}$  at K100 by GSH- $d_0$ -ONE MA (1<sup>nd</sup> trace and 1<sup>st</sup> spectrum) or GSH- $d_9$ -ONE MA (2<sup>nd</sup> trace and 2<sup>nd</sup> spectrum).

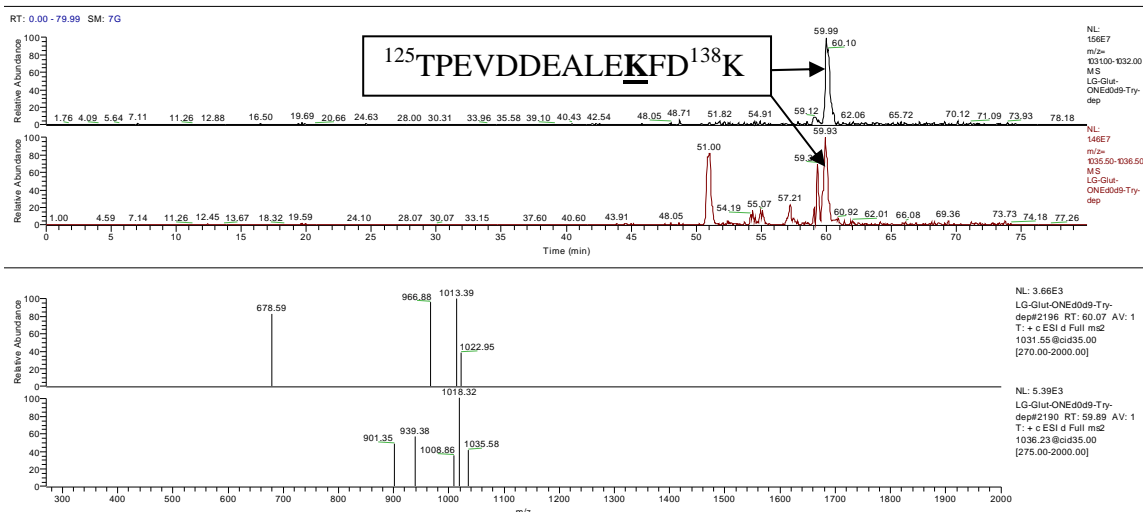

**Figure S12.** SIC and tandem mass spectrum of modified  $^{125}\text{TPEVDDEALEKFD}^{138}\text{K}$  at K135 by GSH- $d_0$ -ONE MA (1<sup>nd</sup> trace and 1<sup>st</sup> spectrum) or GSH- $d_9$ -ONE MA (2<sup>rd</sup> trace and 2<sup>nd</sup> spectrum).

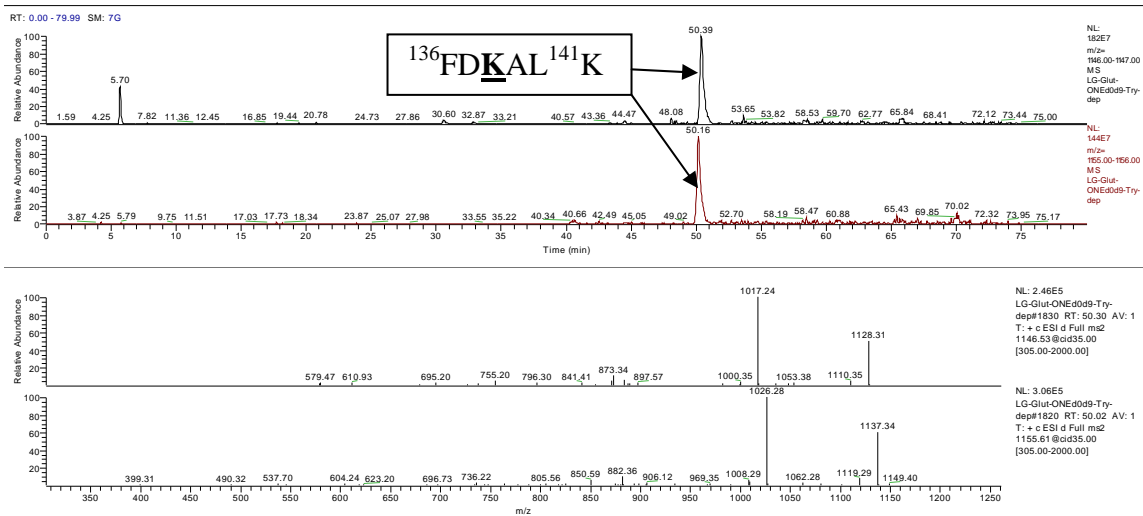

**Figure S13.** SIC and tandem mass spectrum of modified  $^{136}\text{FDKAL}^{141}\text{K}$  at K138 by GSH- $d_0$ -ONE MA (1<sup>nd</sup> trace and 1<sup>st</sup> spectrum) or GSH- $d_9$ -ONE MA (2<sup>rd</sup> trace and 2<sup>nd</sup> spectrum).



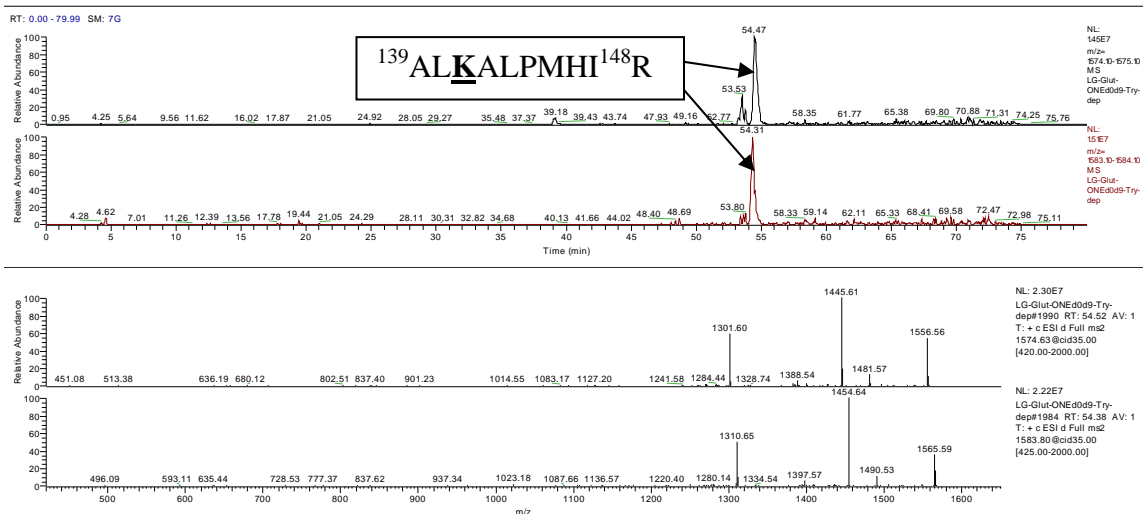

**Figure S14.** SIC and tandem mass spectrum of modified  $^{139}\text{ALKALPMHI}^{148}\text{R}$  at K141 by GSH- $d_0$ -ONE MA (1<sup>nd</sup> trace and 1<sup>st</sup> spectrum) or GSH- $d_9$ -ONE MA (2<sup>nd</sup> trace and 2<sup>nd</sup> spectrum).

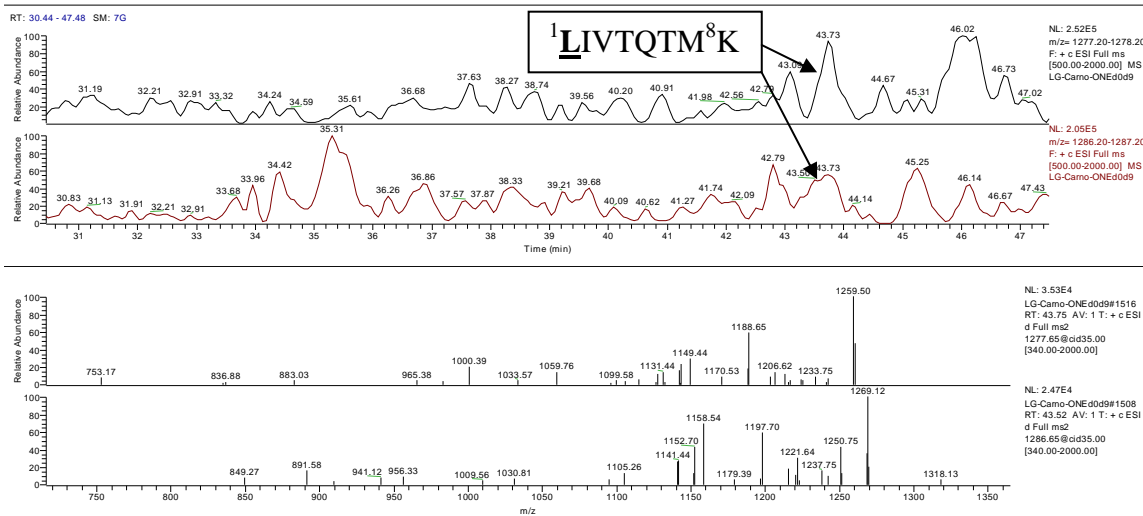

**Figure S15.** SIC and tandem mass spectrum of modified  $^1\text{LIVTQTM}^8\text{K}$  at L1 by carnosine- $d_0$ -ONE MA (1<sup>nd</sup> trace and 1<sup>st</sup> spectrum) or carnosine- $d_9$ -ONE MA (2<sup>nd</sup> trace and 2<sup>nd</sup> spectrum).

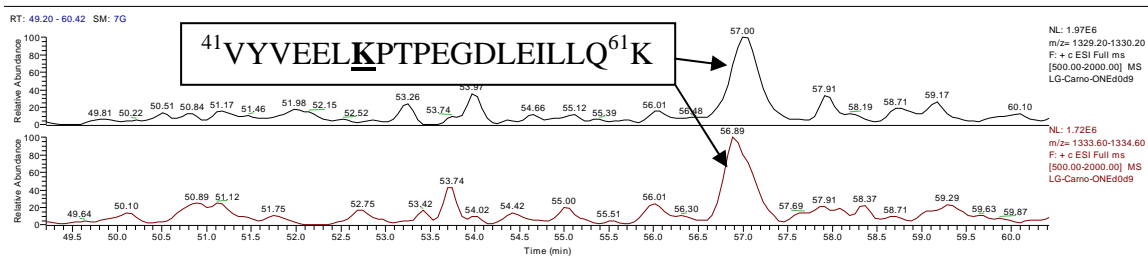

**Figure S16.** SIC and tandem mass spectrum of modified  $^{41}\text{VYVEELKPTPEGDLEILLQ}^{61}\text{K}$  at K47 by carnosine- $d_0$ -ONE MA (1<sup>st</sup> trace and 1<sup>st</sup> spectrum) or carnosine- $d_9$ -ONE MA (2<sup>nd</sup> trace and 2<sup>nd</sup> spectrum).

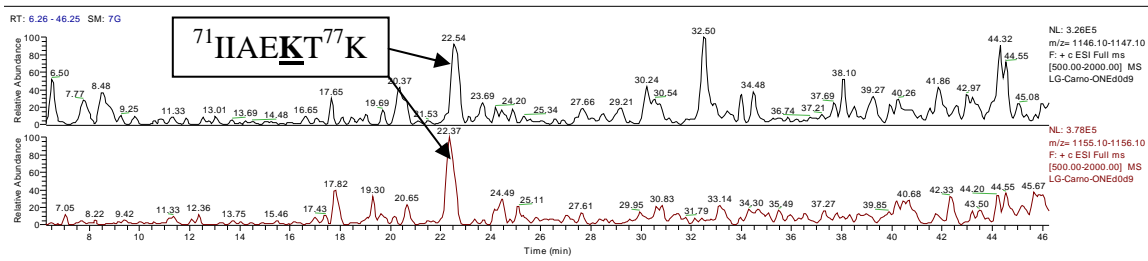

**Figure S17.** SIC and tandem mass spectrum of modified  $^{71}\text{IIAEKT}^{77}\text{K}$  at K75 by carnosine- $d_0$ -ONE MA (1<sup>st</sup> trace and 1<sup>st</sup> spectrum) or carnosine- $d_9$ -ONE MA (2<sup>nd</sup> trace and 2<sup>nd</sup> spectrum).

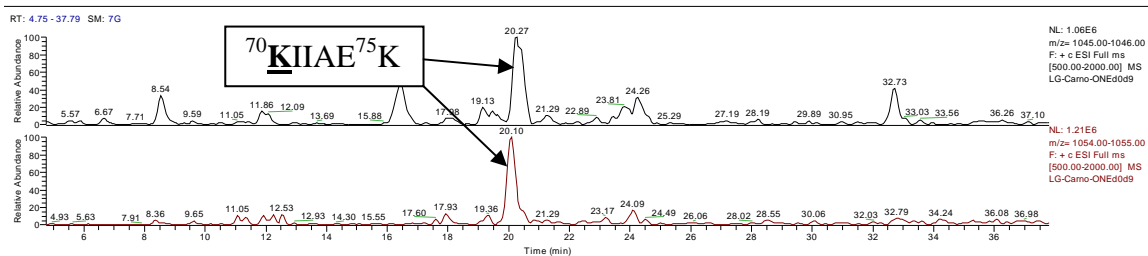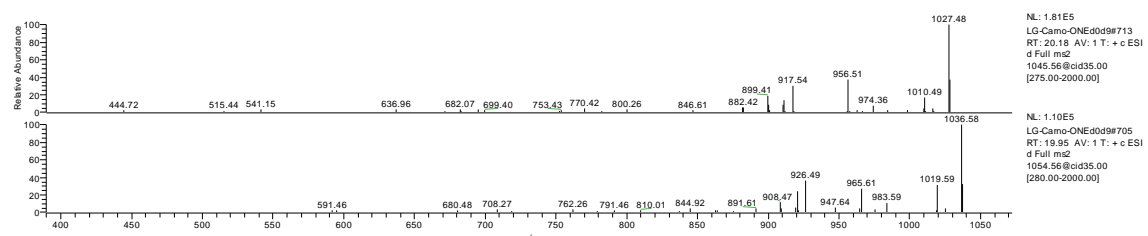

**Figure S18.** SIC and tandem mass spectrum of modified  $^{70}\text{KIIAE}^{75}\text{K}$  at K70 by carnosine- $d_0$ -ONE MA (1<sup>nd</sup> trace and 1<sup>st</sup> spectrum) or carnosine- $d_0$ -ONE MA (2<sup>nd</sup> trace and 2<sup>nd</sup> spectrum).

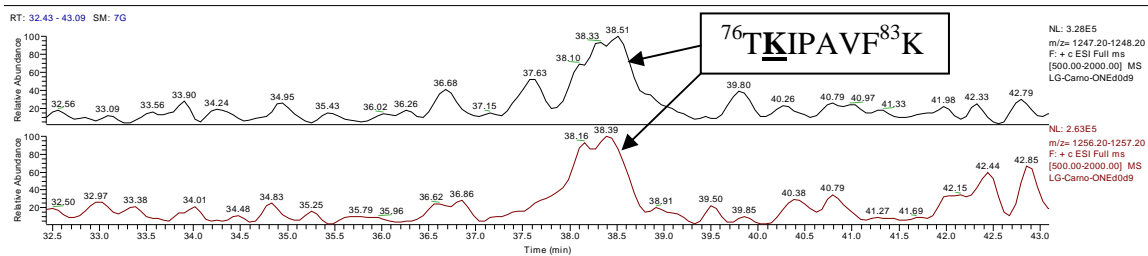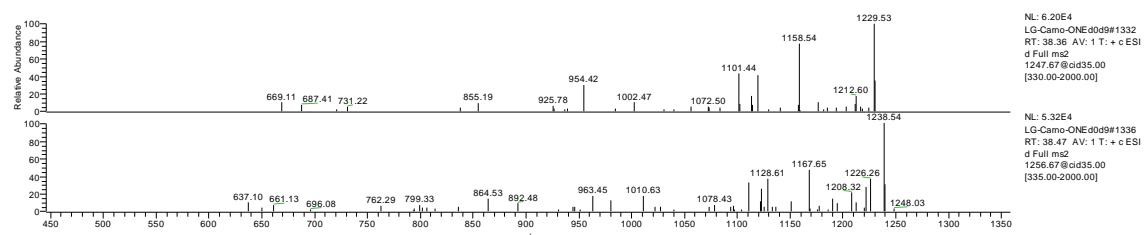

**Figure S19.** SIC and tandem mass spectrum of modified  $^{76}\text{TKIPAVF}^{83}\text{K}$  at K77 by carnosine- $d_0$ -ONE MA (1<sup>nd</sup> trace and 1<sup>st</sup> spectrum) or carnosine- $d_0$ -ONE MA (2<sup>nd</sup> trace and 2<sup>nd</sup> spectrum).

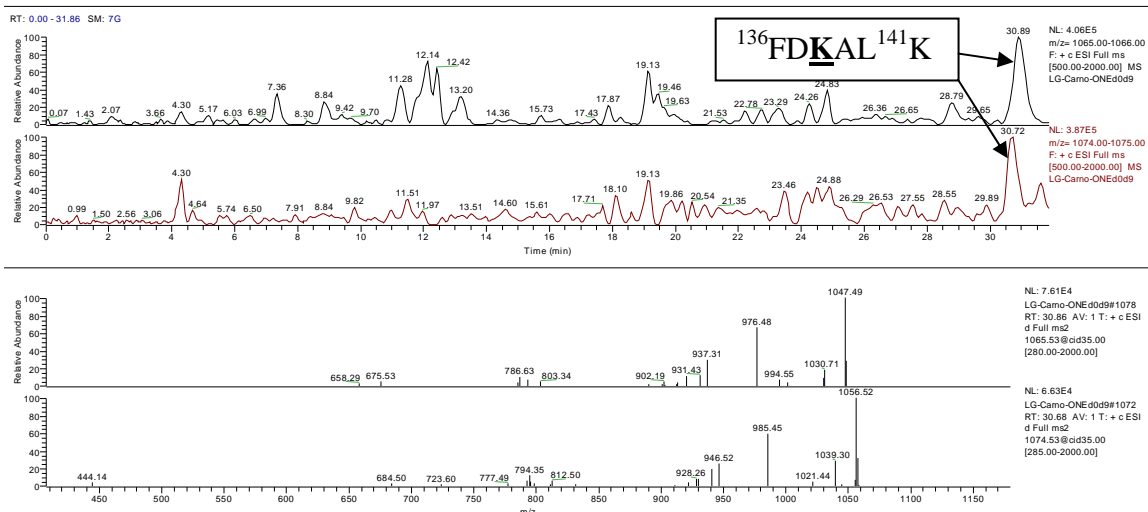

**Figure S20.** SIC and tandem mass spectrum of modified  $^{136}\text{FDKAL}^{141}\text{K}$  at K138 by carnosine- $d_0$ -ONE MA (1<sup>nd</sup> trace and 1<sup>st</sup> spectrum) or carnosine- $d_0$ -ONE MA (2<sup>nd</sup> trace and 2<sup>nd</sup> spectrum).

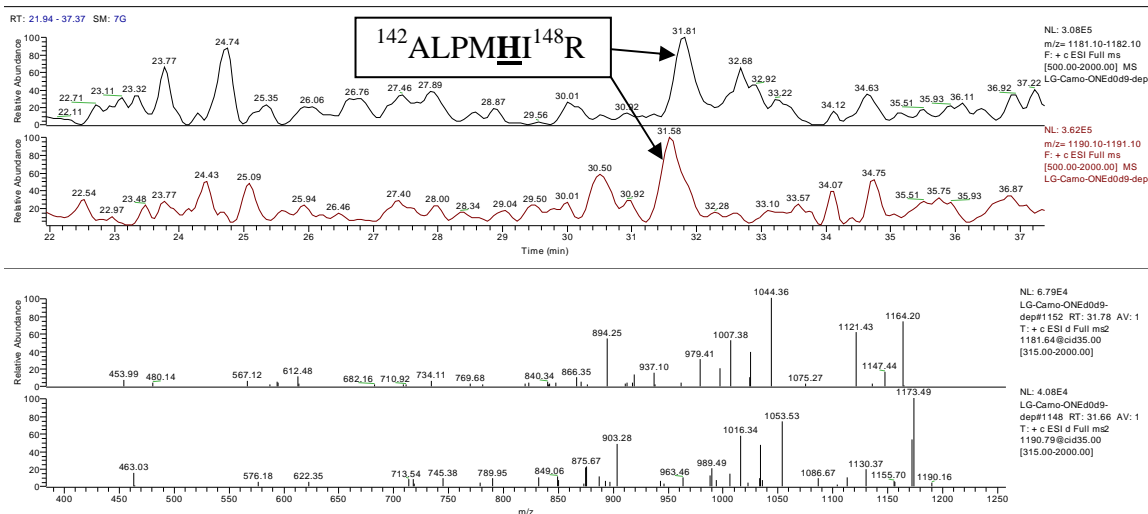

**Figure S21.** SIC and tandem mass spectrum of modified  $^{142}\text{ALPMHI}^{148}\text{R}$  at H146 by carnosine- $d_0$ -ONE MA (1<sup>nd</sup> trace and 1<sup>st</sup> spectrum) or carnosine- $d_0$ -ONE MA (2<sup>nd</sup> trace and 2<sup>nd</sup> spectrum).
